# Supplementary material for: Integrated Analysis of Differentially Expressed miRNAs and mRNAs in Goat Skin Fibroblast Cells in Response to Orf Virus Infection Reveals That cfa-let-7a Regulates Thrombospondin 1 Expression
Source: MDPI journal article supplement (doi:10.3390/v12010118), 2020-01-17
Supplement: s1 [file s1]

Table S11. Primers of selected DE miRNAs in 30h.p.i vs GSF.

| Primer name                    | Sequence ( 5' to 3' )                               |
|--------------------------------|-----------------------------------------------------|
| cgr-miR-1839-3p_R-1 loop       | GTCGTATCCAGTGCAGGGTCCGAGGTATTTCGCACTGGATACGACTGTTGG |
| cgr-miR-1839-3p_R-1 -F         | CGCGCGAGACCTACTTATCTA                               |
| hsa-miR-4286_R+3 loop          | GTCGTATCCAGTGCAGGGTCCGAGGTATTTCGCACTGGATACGACTTTGGT |
| hsa-miR-4286_R+3 -F            | GCGACCCCACTCCTGGT                                   |
| cgr-miR-1260_R+2 loop          | GTCGTATCCAGTGCAGGGTCCGAGGTATTTCGCACTGGATACGACTATGGT |
| cgr-miR-1260_R+2 -F            | CGATCCCACCGCTGCC                                    |
| hsa-miR-1260a_R+1_1ss9TG loop  | GTCGTATCCAGTGCAGGGTCCGAGGTATTTCGCACTGGATACGACTTGGTG |
| hsa-miR-1260a_R+1_1ss9TG -F    | GCGATCCCACCGCTGC                                    |
| PC-3p-2828_1480 loop           | GTCGTATCCAGTGCAGGGTCCGAGGTATTTCGCACTGGATACGACTCAAAA |
| PC-3p-2828_1480 -F             | CGCGAAAAAACCGAGTGAAC                                |
| chi-miR-25-3p loop             | GTCGTATCCAGTGCAGGGTCCGAGGTATTTCGCACTGGATACGACTCAGAC |
| chi-miR-25-3p -F               | GCGCATTGCACTTGTCTCG                                 |
| chi-miR-25-5p loop             | GTCGTATCCAGTGCAGGGTCCGAGGTATTTCGCACTGGATACGACAGCAAT |
| chi-miR-25-5p -F               | AGGCGGAGACTTGGGCA                                   |
| chi-miR-9-5p loop              | GTCGTATCCAGTGCAGGGTCCGAGGTATTTCGCACTGGATACGACTCATAC |
| chi-miR-9-5p -F                | GCGCGTCTTTGGTTATCTAGCT                              |
| chi-miR-34b-3p loop            | GTCGTATCCAGTGCAGGGTCCGAGGTATTTCGCACTGGATACGACGATGGC |
| chi-miR-34b-3p -F              | GCGCGAATCACTAGTTCCACT                               |
| chi-miR-17-3p_R-1_1ss23CA loop | GTCGTATCCAGTGCAGGGTCCGAGGTATTTCGCACTGGATACGACTCTACA |
| chi-miR-17-3p_R-1_1ss23CA -F   | GCGACTGCAGTGAAGGCACT                                |
| Universal Reverse Primer       | AGTGCAGGGTCCGAGGTATT                                |
| U6-F                           | CGCTTCGGCAGCACATATACTA                              |
| U6-R                           | CGCTTCACGAATTTGCGTGTCA                              |
