# Supplementary material for: Integrated Analysis of Differentially Expressed miRNAs and mRNAs in Goat Skin Fibroblast Cells in Response to Orf Virus Infection Reveals That cfa-let-7a Regulates Thrombospondin 1 Expression
Source: MDPI journal article supplement (doi:10.3390/v12010118), 2020-01-17
Supplement: s1 [file s1]

Table S10. Primers of selected common DE miRNAs in 30h.p.i vs GSF and 18h.p.i vs GSF.

| Primer name              | Sequence ( 5' to 3' )                               |
|--------------------------|-----------------------------------------------------|
| chi-miR-122 R-1 loop     | GTCGTATCCAGTGCAGGGTCCGAGGTATTTCGCACTGGATACGACAAACAC |
| chi-miR-122 R-1 -F       | CGCGTGGAGTGTGACAATG                                 |
| cfa-miR-132-R-1 loop     | GTCGTATCCAGTGCAGGGTCCGAGGTATTTCGCACTGGATACGACCGACCA |
| cfa-miR-132-R-1 -F       | GCGCGTAACAGTCTACAGCCA                               |
| cfa-miR-1839L-1R+3 loop  | GTCGTATCCAGTGCAGGGTCCGAGGTATTTCGCACTGGATACGACTCACAA |
| cfa-miR-1839 L-1R+3 -F   | CGCGAGGTAGATAGAACAGGTC                              |
| cfa-let-7a_R+2 loop      | GTCGTATCCAGTGCAGGGTCCGAGGTATTTCGCACTGGATACGACTTAACT |
| cfa-let-7a_R+2 -F        | GCGCGTGAGGTAGTAGGTTGTAT                             |
| cfa-miR-101_R+3 loop     | GTCGTATCCAGTGCAGGGTCCGAGGTATTTCGCACTGGATACGACTCTTCA |
| cfa-miR-101_R+3 -F       | GCGCGGTACAGTACTGTGATAAC                             |
| sha-miR-125a_R+2 loop    | GTCGTATCCAGTGCAGGGTCCGAGGTATTTCGCACTGGATACGACTCTCAC |
| sha-miR-125a_R+2 -F      | GCGTCCCTGAGACCCTAACTT                               |
| chi-miR-127-3p_R+2 loop  | GTCGTATCCAGTGCAGGGTCCGAGGTATTTCGCACTGGATACGACAGCCAA |
| chi-miR-127-3p_R+2 -F    | CGTCGGATCCGTCTGAGC                                  |
| Universal Reverse Primer | AGTGCAGGGTCCGAGGTATT                                |
| U6-F                     | CGCTTCGGCAGCACATATACTA                              |
| U6-R                     | CGCTTCACGAATTTGCGTGTCA                              |
