# Supplementary material for: Integrated Analysis of Differentially Expressed miRNAs and mRNAs in Goat Skin Fibroblast Cells in Response to Orf Virus Infection Reveals That cfa-let-7a Regulates Thrombospondin 1 Expression
Source: MDPI journal article supplement (doi:10.3390/v12010118), 2020-01-17
Supplement: s1 [file s1]

Table S12. Primers of DEGs enriched in "negative regulation of viral genome replication".

| Primer name    | Sequence ( 5'to3' )   |
|----------------|-----------------------|
| EIF2AK2-F      | GGCTGCCAAACTGGCTTATG  |
| EIF2AK3-R      | CCCACACGCGGTATTGAAAC  |
| RSAD2-F        | CCCACCAGCGTCAATTACCA  |
| RSAD2-R        | CACGAAGGACGTTTTGGCTG  |
| ISG15-F        | CGGACCAATTCTGGCTGTCT  |
| ISG15-R        | CCCCGCAGACGTAGATTCAT  |
| CCL5-F         | TCCATGGCAGCAGTTGTCTTT |
| CCL5-R         | TTGATGTACTCTCGCACCCA  |
| ZC3HAV1-F      | CCACACCTTCATCCGTCACA  |
| ZC3HAV1-R      | CTCAGCTCGTAGTTGCGTGA  |
| LOC102173932-F | GGCCTGCATGTGTTGACAAG  |
| LOC102173932-R | TGGATTGCCCAAGACTGGAC  |
| ADAR-F         | TACCAAGCGAAAGTTGGGGG  |
| ADAR-R         | GAGAGGGAGCTCTGTGAAACC |
| GAPDH-F        | AGCCGTAACCTTCTGTGCTGT |
| GAPDH-R        | TTCCCGTTCTCTGCCTTGAC  |
