# Supplementary figures and images for: Integrated Analysis of Differentially Expressed miRNAs and mRNAs in Goat Skin Fibroblast Cells in Response to Orf Virus Infection Reveals That cfa-let-7a Regulates Thrombospondin 1 Expression
Source: MDPI journal article supplement (doi:10.3390/v12010118), 2020-01-17

Figure S1. Venn diagram of miRNAs detected in GSF samples at 0h.p.i, 18h.p.i and 30h.p.i.

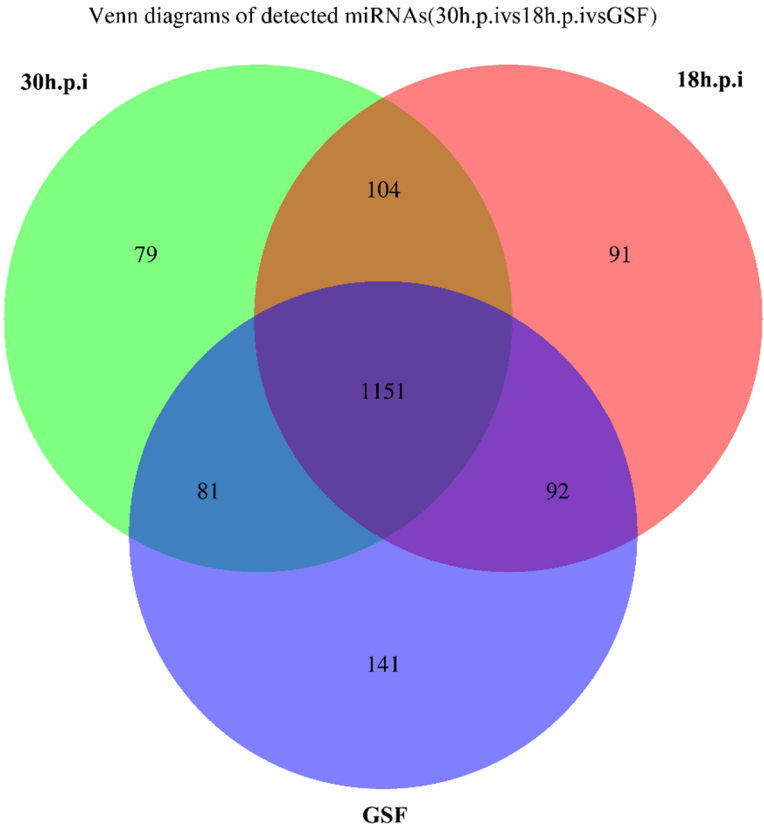

Supplement: s1 [file s1]

Figure S2. Predicted target genes of cfa-let-7a\_R+2.

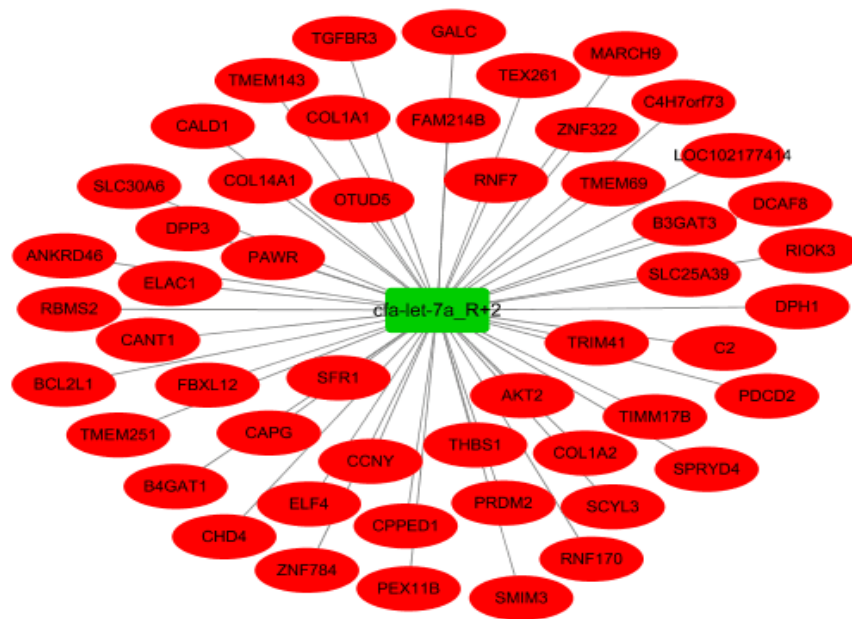

Supplement: s1 [file s1]
